# Supplementary material
Source: MDPI journal article supplement (https://www.mdpi.com/2076-3417/14/2/904)
Supplement: s1 [file s1]

**Table S1.** Classification of Igeo that represents various levels of pollution.

| <b>0</b> | <b>Igeo&lt;0</b> | <b>Unpolluted</b>                 |
|----------|------------------|-----------------------------------|
| <b>1</b> | 0<Igeo<1         | Unpolluted to moderately polluted |
| <b>2</b> | 1<Igeo<2         | Moderately polluted               |
| <b>3</b> | 2<Igeo<3         | Moderately to strongly polluted   |
| <b>4</b> | 3<Igeo<4         | Strongly polluted                 |
| <b>5</b> | 4<Igeo<5         | Strongly polluted                 |
| <b>6</b> | 5<Igeo           | Extremely polluted                |

**Table S2.** Background value for the respective metal.

| <b>Metals</b>               | <b>As</b> | <b>Cd</b> | <b>Cr</b> | <b>Cu</b> | <b>Pb</b> | <b>Ni</b> | <b>Zn</b> | <b>Hg</b> |
|-----------------------------|-----------|-----------|-----------|-----------|-----------|-----------|-----------|-----------|
| Background value<br>(mg/Kg) | 6         | 0.6       | 26        | 16        | 31        | 16        | 120       | 0.2       |

**Table S3.** Toxic response factor quotients for the studied heavy metals.

| <b>Heavy metals</b>   | <b>As</b> | <b>Cd</b> | <b>Cr</b> | <b>Cu</b> | <b>Pb</b> | <b>Ni</b> | <b>Zn</b> | <b>Hg</b> |
|-----------------------|-----------|-----------|-----------|-----------|-----------|-----------|-----------|-----------|
| <b>Tr<sup>i</sup></b> | 10        | 30        | 2         | 5         | 5         | 5         | 1         | 40        |

**Table S4.** Various ER and RI index levels represent risks to the aquatic environment.

| <b>Class</b> | <b>Er<sup>i</sup></b> | <b>Significance</b> | <b>RI value</b> | <b>Significance</b> |
|--------------|-----------------------|---------------------|-----------------|---------------------|
| I            | ≤40                   | Low Risk            | ≤150            | Low Risk            |
| II           | >40<80                | Medium Risk         | >150<300        | Medium Risk         |
| III          | >80<160               | High Risk           | ≥300            | High Risk           |
| IV           | >160<320              | High Risk           | ≥600            | Very High Risk      |
| V            | ≥320                  | Very High Risk      | ≥1200           |                     |

**Table S5.** Water quality level determination based on the Nemerow pollution index method.

| <b>Water quality level</b> | <b>NPI</b> |
|----------------------------|------------|
| <b>No pollution</b>        | ≤0.7       |
| <b>Low pollution</b>       | >0.7 <1    |
| <b>Moderate pollution</b>  | >1 <2      |
| <b>High pollution</b>      | >2.00 <3   |
| <b>Very High pollution</b> | ≥3         |
